# Supplementary material
Source: PubMed Central journal article supplement (PMC9680010)
Supplement: NIHMS1840113-supplement-Supplemental_Publication_Material.pdf [file NIHMS1840113-supplement-Supplemental_Publication_Material.pdf]

1 **Customizing place-tailored messaging using a multi-level approach: Pilot study of the Step**  
2 **It Up physical activity mobile app tailored to neighborhood environment**

3

4 Nithya P. Vijayakumar, MD<sup>1\*</sup> ; Sam J. Neally, BA<sup>1\*</sup> ; Kameswari A. Potharaju, BA<sup>1</sup>; Kaveri  
5 Curlin, BS<sup>1</sup>; James F. Troendle, PhD<sup>2</sup>; Billy S. Collins, DHSc<sup>1</sup>; Valerie M. Mitchell, BA<sup>1</sup>;  
6 Kosuke Tamura, PhD<sup>3</sup>; Colby Ayers, MS<sup>4</sup>; Mario A. Pita, BS<sup>1</sup>; Hannatu Tarfa, BA<sup>1</sup>; Keitra  
7 Thompson, DNP<sup>1</sup>; Foster Osei Baah, PhD, RN<sup>1</sup>; Andrew S. Baez, BS<sup>1</sup>; Lola Ortiz-Whittingham,  
8 BS<sup>1</sup>; Jennifer Wills Gallagher, MPPA, RD<sup>5</sup>; Regina McCoy, MPH<sup>5</sup>, Michael Heist, BS<sup>5</sup>;  
9 Cristhian A. Gutierrez-Huerta, BS<sup>1</sup>; Briana S. Turner, BA<sup>1</sup>; Yvonne Baumer, PhD<sup>1</sup>; Nicole  
10 Farmer, MD<sup>6</sup>; Gwenyth R. Wallen, PhD, RN<sup>6</sup>, Tonya Dodge, PhD<sup>7</sup>; Tiffany M. Powell-Wiley,  
11 MD MPH, FAHA<sup>1,8</sup>

12 \* Authors contributed equally

13

14 **SUPPLEMENTAL METHODS**

15 **1. Community Engagement and Recruitment Process**

16 Community engagement is a fundamental facet of our research and we first sought to develop  
17 partnerships with faith-based organizations, health care organizations, academic institutions, and  
18 other community-based organizations aiming to improve cardiovascular health. This led to the  
19 development of the DC Cardiovascular Health and Obesity Collaborative (DC CHOC)  
20 community advisory board, with whom we partnered in the development and implementation of  
21 the Washington DC Cardiovascular Health and Needs Assessment (DC CHNA), which was  
22 crucial to understand community cardiovascular health and the feasibility of using digital health  
23 tools for improving cardiovascular health for the development of the Step It Up app and

24 intervention.<sup>4</sup> For the development of the Step It Up app, DC CHOC also provided feedback and  
25 advice for app design and function. Specifically, we emailed a questionnaire to the members of  
26 DC CHOC, followed by telephone interviews to identify barriers to PA and solicit suggestions  
27 for motivational messaging to encourage PA; these messages are being used in the app. We also  
28 got feedback from DC CHOC on community-based PA locations to include for the tailored-to-  
29 place messaging that might not be found in internet searches.<sup>4</sup> After implementing the pilot  
30 intervention, we conducted surveys where participants provided information about their  
31 experiences with the app. We therefore sought feedback from the community both before and  
32 after the implementation of the pilot.

33

34 Participant recruitment information can be found in our previous publications, wherein we  
35 described building our community partnerships with the DC CHOC community advisory board  
36 and how we implemented the Communication, Awareness, Relationships, and Empowerment  
37 (C.A.R.E.) model in our recruitment efforts in the community.<sup>4</sup> Briefly, we had a diverse  
38 research team in implementing the study who were chosen for their professional expertise,  
39 knowledge, and experience working with populations from limited-resource communities.  
40 Recruitment efforts were led by a community outreach coordinator. The coordinator developed  
41 and maintained relationships with DC CHOC, local health advocacy groups, and other  
42 community-based organizations working with African Americans so that those in these groups  
43 were aware of the study and could send potential participants to the outreach coordinator for  
44 additional information and possible enrollment. The study has been advertised at different  
45 outreach events in the DC area through flyers, social media posts, and community presentations  
46 in each phase of study implementation. We have also sought to empower the community by

47 engaging with DC CHOC on each step in the design of Step It Up so that members could provide  
48 input on the study design; we seek to empower study participants by making sure they have  
49 access to their cardiovascular health data collected as a part of the study so they understand their  
50 individual cardiovascular risk and can share that information with their health care providers.

51

## 52 **2. Multi-Level Framework**

53 The Step It Up app was designed based on a multi-level framework, where messaging can be  
54 provided to address individual-level barriers to PA (standard messaging) and neighborhood-level  
55 barriers to PA (tailored-to-place messaging). While the Step It Up app does not directly facilitate  
56 true upstream changes in the environment or policy, it does serve to increase the awareness and  
57 utilization of physical activity resources available in target communities. Because neighborhood  
58 physical resources may be lacking for our participants in deprived neighborhoods, the available  
59 gyms, parks, recreation centers, and other PA resources become all the more valuable. By  
60 incorporating tailored-to-place messages, we hope to increase both awareness and utilization of  
61 these valuable PA resources. In fact, participants have expressed that these messages were useful  
62 to discover PA resources, which was associated with favorable neighborhood perceptions.

63 Additionally, we foresee the data we collect on the use of community PA resources will be  
64 useful in the development of true environmental interventions, informing future projects which  
65 may aim to increase and optimize physical activity resources of neighborhoods and communities.

66 **Figure S1** describes our multi-level framework from a previous publication.<sup>4</sup>

67

## 68 **3. Tailored-to-Place Messages**

### 69 3a. Location Registry

70 There are two sources of locations for tailored-to-place messaging. The first source was  
71 compiled by the research team and includes numerous local gyms, recreation centers, parks, and  
72 trails in areas where participants live. This first source of locations also included PA locations  
73 identified through feedback from the community advisory board with whom we work, such as  
74 church locations with fitness classes that might not be found through internet searches.<sup>4</sup> Push  
75 notifications were sent to participants upon entering a 1200m radius of the location, and these  
76 locations were used for all participants. The second source of locations is provided by  
77 participants themselves and not available to other participants. These participant-specific  
78 locations include formal locations for physical activity but also informal PA spaces such as  
79 schools, homes, and workplaces.

80

### 81 3b. Reporting Unsafe Locations

82 We have developed a feature that allows users to flag unsafe locations upon receiving a tailored-  
83 to-place message for that location (**Figure S2**). Reporting of unsafe locations are fully  
84 determined by user discretion and not administrator approval, allowing the user base to  
85 collectively determine acceptable levels of safety in PA resources. The definition of unsafe is  
86 based on user perceptions, not only about crime but also factors such as lack of lighting, unlevel  
87 sidewalks, and presence of dogs. Upon flagging by one user, the location is removed from the  
88 registry for all users. Trust in the community to report unsafe locations may be supported by the  
89 open community forum available within the app, where participants can post discussion topics  
90 and participate in reply threads. We hope to build this community of app users, not only to  
91 facilitate trust in the process of reporting unsafe locations, but to begin improving SDoH like  
92 neighborhood social cohesion.

93 The option to flag unsafe locations was added as a result of the findings from this pilot study and  
94 we will analyze how participating in location flagging is associated with changes in  
95 neighborhood perception in the full study. We hypothesize that the ability to flag unsafe  
96 locations and the knowledge that unsafe locations are promptly removed may improve user  
97 perception of neighborhood safety.

98

99

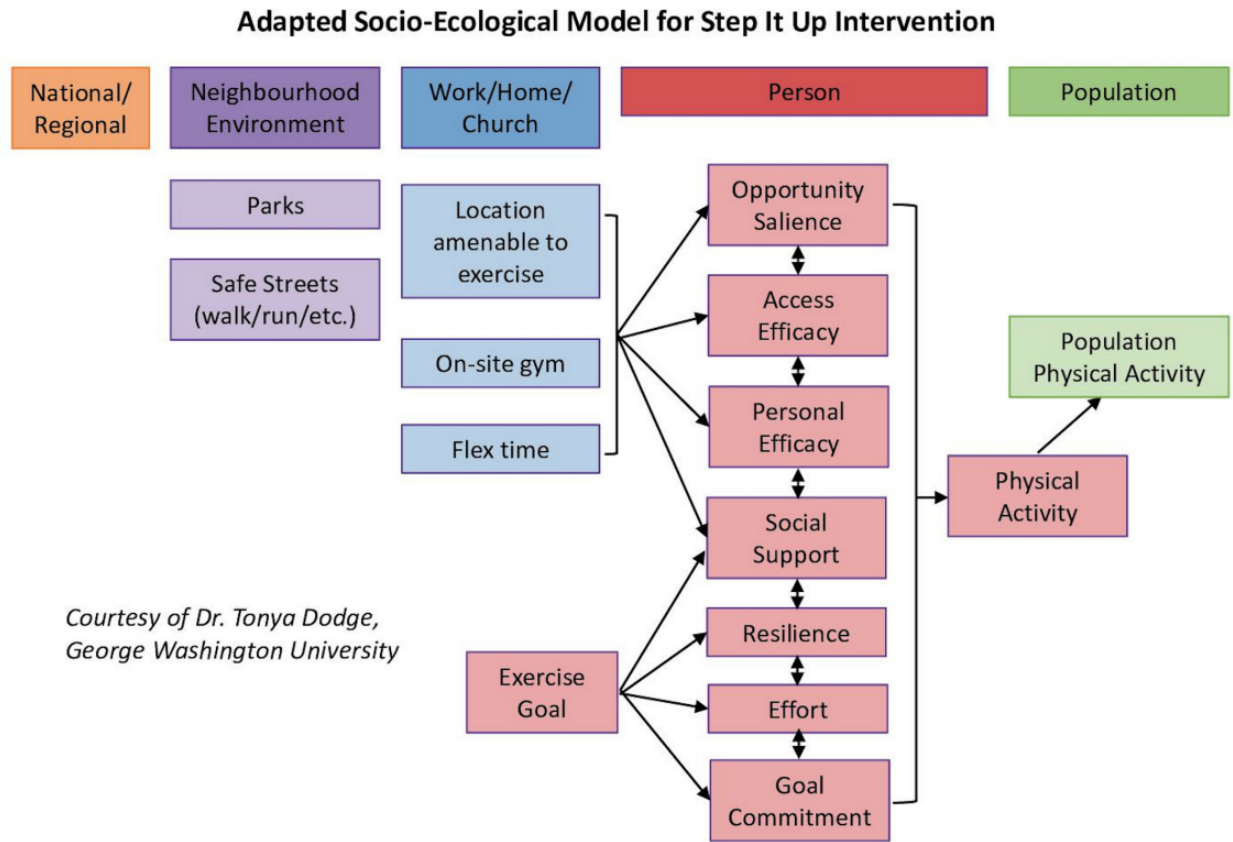

101

102 **Figure S1.** Adapted socioecological model that accounts for various factors affecting an  
 103 individual’s decision to engage in physical activity. Tailored-to-place messaging will focus on  
 104 the neighborhood environment and work/home/church levels of the socioecological model, while  
 105 standard-remote messaging focuses on the person-level.<sup>4</sup>

106

107

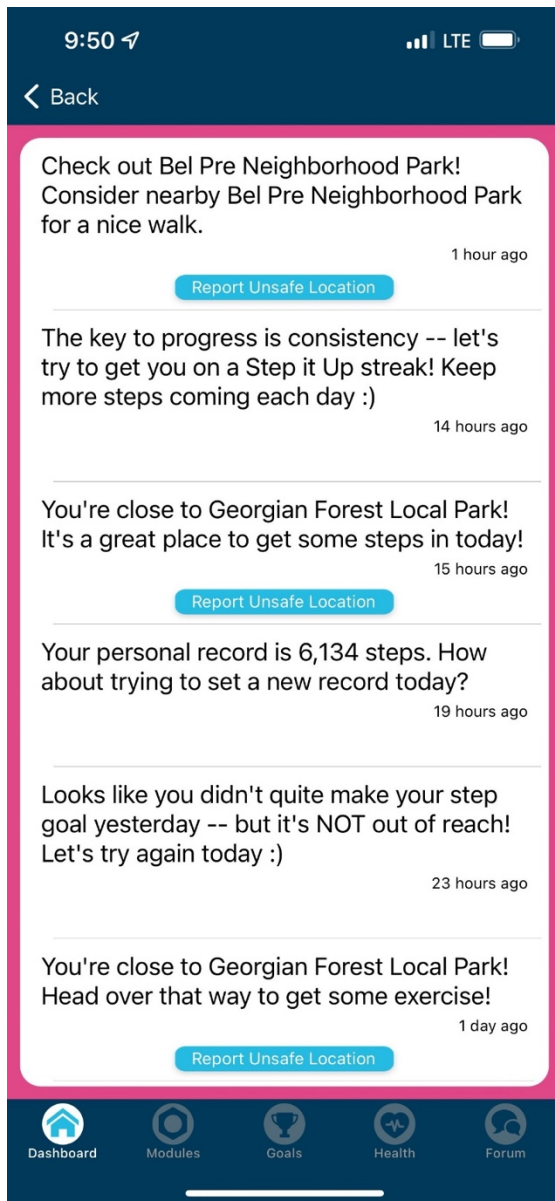

109 **Figure S2.** Displayed here is the Message Center of the Step It Up app. The complete history of  
 110 Step It Up notifications are visible here, including tailored-to-place messages. Seen below the  
 111 tailored-to-place messages is a button, “Report Unsafe Location”, that participants can use to  
 112 flag unsafe locations.

113 **SUPPLEMENTAL TABLE**

114  
 115 **Table S1.** Baseline patient characteristics (n=24) focused on AA women living in lower-  
 116 resourced neighborhoods within the Washington, D.C. metropolitan area (Wards 5, 7, 8, and the  
 117 contiguous Prince George’s County, MD). Continuous variables are reported as Mean ± SD,  
 118 while categorical variables are shown as N (%).

|                                           |                               | Participants (N=24) |
|-------------------------------------------|-------------------------------|---------------------|
| <b>Individual Characteristics</b>         | Age, years                    | 57.0 (±12.4)        |
|                                           | Female, N (%)                 | 24 (100)            |
|                                           | Race, African American, N (%) | 24 (100)            |
| <i>Education</i>                          | College or more               | 23 (95.8%)          |
|                                           | High school graduate          | 1 (4.2%)            |
|                                           | Less than high school         | 0 (0%)              |
| <i>Income</i>                             | ≥\$60,000/year                | 15 (62.5%)          |
|                                           | <\$60,000/year                | 7 (29.2%)           |
|                                           | Not reported                  | 2 (8.3%)            |
| <b>Health-related factors</b>             | BMI*                          | 34.8 (±6.3)         |
|                                           | Daily Steps                   | 8535.9 (±3566.6)    |
| <b>Psychosocial/Environmental Factors</b> | Social Isolation              | 0.3 (±0.5)          |
|                                           | Social Cohesion               | 14.3 (±3.7)         |
|                                           | Safety                        | 3.7 (±1.0)          |
| <b>App Use</b>                            | Engagement                    | 9.8 (±6.4)          |

119 \*BMI: Body Mass Index



120 **Table S2.** Average wear time of Fitbit in hours per day, for Week 1, 2, and 3 of the pilot. The  
 121 detection of a heartrate per minute of the day was used to calculate the total amount of time a  
 122 Fitbit was worn. Minutes where heartrate was not detected were not counted towards wear time.

| <b>Average wear time (hours per day)</b> |               |               |               |                  |
|------------------------------------------|---------------|---------------|---------------|------------------|
| <b>Participant ID</b>                    | <b>Week 1</b> | <b>Week 2</b> | <b>Week 3</b> | <b>Weeks 1-3</b> |
| 1                                        | 21.08         | 20.79         | 18.29         | 20.05            |
| 2                                        | 23.15         | 23.26         | 23.53         | 23.31            |
| 3                                        | 20.97         | 23.50         | 22.87         | 22.45            |
| 4                                        | 17.45         | 20.52         | 15.31         | 17.76            |
| 5                                        | 21.16         | 22.76         | 22.44         | 22.12            |
| 6                                        | 22.81         | 22.91         | 23.68         | 23.13            |
| 7                                        | 23.37         | 23.02         | 22.81         | 23.07            |
| 8                                        | 22.27         | 23.26         | 23.46         | 23.00            |
| 9                                        | 21.51         | 22.34         | 21.14         | 21.66            |
| 10                                       | 23.61         | 23.65         | 23.61         | 23.62            |
| 11                                       | 19.60         | 22.04         | 21.87         | 21.17            |
| 12                                       | 23.32         | 23.40         | 23.65         | 23.46            |
| 13                                       | 19.05         | 21.99         | 20.04         | 20.36            |
| 14                                       | 16.01         | 18.46         | 14.61         | 16.36            |
| 15                                       | 23.33         | 23.50         | 23.71         | 23.51            |
| 16                                       | 15.85         | 15.96         | 15.02         | 15.61            |
| 17                                       | 23.62         | 22.27         | 23.44         | 23.11            |
| 18                                       | 21.41         | 21.41         | 22.69         | 21.84            |

|  |                         |       |       |       |       |
|--|-------------------------|-------|-------|-------|-------|
|  | 19                      | 14.22 | 20.03 | 21.56 | 18.60 |
|  | 20                      | 22.07 | 18.24 | 20.95 | 20.42 |
|  | 21                      | 22.75 | 22.51 | 19.66 | 21.64 |
|  | 22                      | 18.67 | 19.92 | 6.30  | 14.96 |
|  | 23                      | 23.49 | 21.41 | 16.08 | 20.33 |
|  | 24                      | 22.86 | 20.90 | 20.50 | 21.42 |
|  | <b>All participants</b> | 20.99 | 21.59 | 20.30 | 20.96 |

123  
124

125 **Table S3.** Characteristics and Associations of Neighborhood Environment by Engagement,  
 126 adjusted for Age and BMI. (Highlighted in “bold” font indicates significance)

|                  | Fully adjusted model (Age, BMI*) |             |
|------------------|----------------------------------|-------------|
|                  | Parameter Estimate               | p-value     |
| Social Isolation | 5.2 (2.4)                        | <b>0.04</b> |
| Social Cohesion  | 3.5 (1.4)                        | <b>0.02</b> |
| Safety           | 3.0 (1.3)                        | <b>0.03</b> |

127 \*BMI – body mass index

128

129
